# Supplementary material for: Identification of Terpenoid Compounds and Toxicity Assays of Essential Oil Microcapsules from Artemisia stechmanniana
Source: MDPI journal article supplement (doi:10.3390/insects14050470), 2023-05-16
Supplement: s1 [file s1]

**Table S1. Box-Behnken Design factors and level for microencapsule**

| Plants essential oil              | Core/Shell mass ratios | Embedding rate (%) | Loading rate (%) |
|-----------------------------------|------------------------|--------------------|------------------|
| <i>Artemisia mongolica</i> *      | 1:8                    | 68                 | 8.5              |
| <i>Artemisia mongolica</i> *      | 1:6                    | 48                 | 6.8              |
| <i>Artemisia mongolica</i> *      | 1:10                   | 55                 | 7.4              |
| <i>Artemisia stechmanniana</i> ** | 1:8                    | 52                 | 8.6              |

\* Modified from Liu C., Liu Z.L., Zhang R., Huang W.G., Wang F., Quan M.R. (2022) Control Effect of the Essential Oil of *Artemisia mongolica* against Three Main Pests of Wolfberry (*Lycium barbarum*). Chinese Journal of Biological Control, 1-11.

\*\* microencapsule in this study.

**Table S2. GC–MS analys relative proportion (in %) of main components from *A. stechmanniana* and *A. mongolica* EOs in the terpenoid compounds**

|                         | Eucalyptol | (+)-2-Bornanone | 1-(1,2,3-Trimethyl-cyclopent-2-enyl)-ethanone | (-)-Spathulenol | Others |
|-------------------------|------------|-----------------|-----------------------------------------------|-----------------|--------|
| <i>A. stechmanniana</i> | 15.84      | 16.92           | 25.63                                         | 16.38           | 25.26  |
| <i>A. mongolica</i>     | 28.24      | 3.49            | 0                                             | 0.45            | 67.82  |

**Table S3. Cotronl efficacy (CE%) of *A. stechmanniana* essential oil to three different insect species in the *Lycium barbarum* field**

| Insects                | Days | Compound | Control efficacy | CE |
|------------------------|------|----------|------------------|----|
| <i>A. gossypii</i>     | 1    | Dose I   | 53.54±1.30       | M  |
|                        | 3    |          | 54.26±2.61       | M  |
|                        | 7    |          | 60.54±1.17       | S  |
|                        | 14   |          | 50.66±0.90       | M  |
|                        | 21   |          | 40.39±1.44       | M  |
| <i>F. occidentalis</i> | 1    | Dose I   | 51.98±2.02       | M  |
|                        | 3    |          | 53.73±1.55       | M  |
|                        | 7    |          | 33.3±1.38        | M  |
|                        | 14   |          | 41.65±0.93       | M  |
|                        | 21   |          | 41.65±0.93       | M  |
| <i>B. gobica</i>       | 1    | Dose I   | 59.13±1.37       | M  |
|                        | 3    |          | 54.65±1.81       | M  |
|                        | 7    |          | 67.16±1.43       | S  |
|                        | 14   |          | 45.22±0.80       | M  |
|                        | 21   |          | 43.92±3.63       | M  |
| <i>A. gossypii</i>     | 1    | Dose II  | 71.27±0.84       | S  |
|                        | 3    |          | 71.21±0.56       | S  |
|                        | 7    |          | 66.30±1.69       | S  |
|                        | 14   |          | 52.51±2.06       | M  |
|                        | 21   |          | 55.60±1.74       | M  |
| <i>F. occidentalis</i> | 1    | Dose II  | 53.98±0.88       | M  |
|                        | 3    |          | 56.48±2.37       | M  |
|                        | 7    |          | 38.35±0.97       | M  |
|                        | 14   |          | 44.54±2.12       | M  |
|                        | 21   |          | 44.54±2.12       | M  |
| <i>B. gobica</i>       | 1    | Dose II  | 60.88±2.21       | S  |
|                        | 3    |          | 70.11±0.70       | S  |
|                        | 7    |          | 71.19±0.79       | S  |
|                        | 14   |          | 54.20±0.98       | M  |
|                        | 21   |          | 46.92±2.08       | M  |
| <i>A. gossypii</i>     | 1    | Dose III | 76.91±1.24       | S  |
|                        | 3    |          | 75.87±1.90       | S  |
|                        | 7    |          | 73.16±0.67       | S  |
|                        | 14   |          | 51.83±1.35       | M  |
|                        | 21   |          | 52.67±1.34       | M  |
| <i>F. occidentalis</i> | 1    | Dose III | 60.64±0.86       | S  |
|                        | 3    |          | 62.39±1.20       | S  |
|                        | 7    |          | 45.31±2.03       | M  |
|                        | 14   |          | 51.17±0.93       | M  |
|                        | 21   |          | 51.17±0.93       | M  |
|                        | 1    | Dose III | 72.00±1.95       | S  |
|                        | 3    |          | 76.56±0.59       | S  |

|                  |    |            |   |
|------------------|----|------------|---|
| <i>B. gobica</i> | 7  | 83.60±2.00 | S |
|                  | 14 | 62.38±1.84 | S |
|                  | 21 | 55.14±1.27 | M |

CE, Control efficacy. S, strong (CE > 60%); M, moderate (20% < CE <60%); Dose I: 129 g a.i./hm<sup>2</sup>; Dose II: 258 g a.i./hm<sup>2</sup>; Dose III: 516 g a.i./hm<sup>2</sup>.
